# Supplementary material for: Hexafluoroisopropanol-based deep eutectic solvents for high-performance DNA extraction
Source: Royal Society of Chemistry journal article supplement (doi:10.1039/d3ra00315a), 2023-01-01
Supplement: d3ra00315a1.pdf [file d3ra00315a1.pdf]

# Hexafluoroisopropanol-based Deep Eutectic Solvents for High-performance DNA Extraction

Jia Xu, Yuan Yang, Xiaonan Cai and Han Xiao\*

Institute of Maternal and Child Health, Wuhan Children's Hospital (Wuhan Maternal and Child Healthcare Hospital), Tongji Medical College, Huazhong University of Science & Technology, Wuhan, 430016, China.

\* Corresponding author: Han Xiao

E-mail address: [tjxiaohan@hust.edu.cn](mailto:tjxiaohan@hust.edu.cn) (H. Xiao)

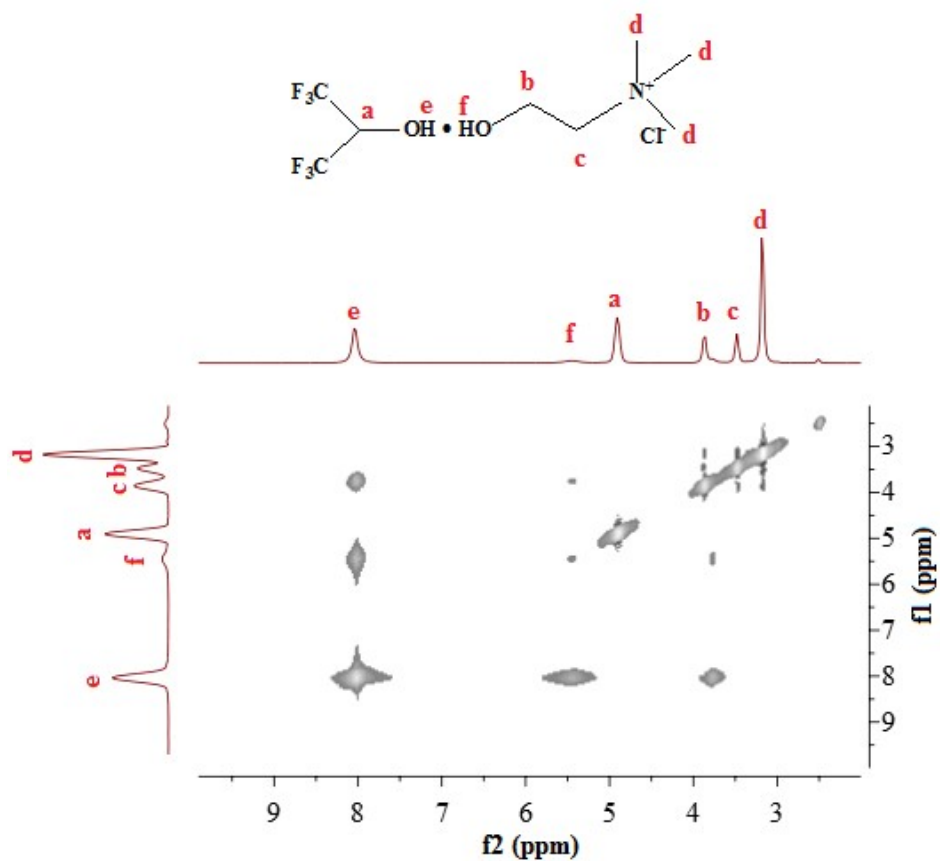

**Fig. S1** NOESY spectra of HFIP/ChCl DES.

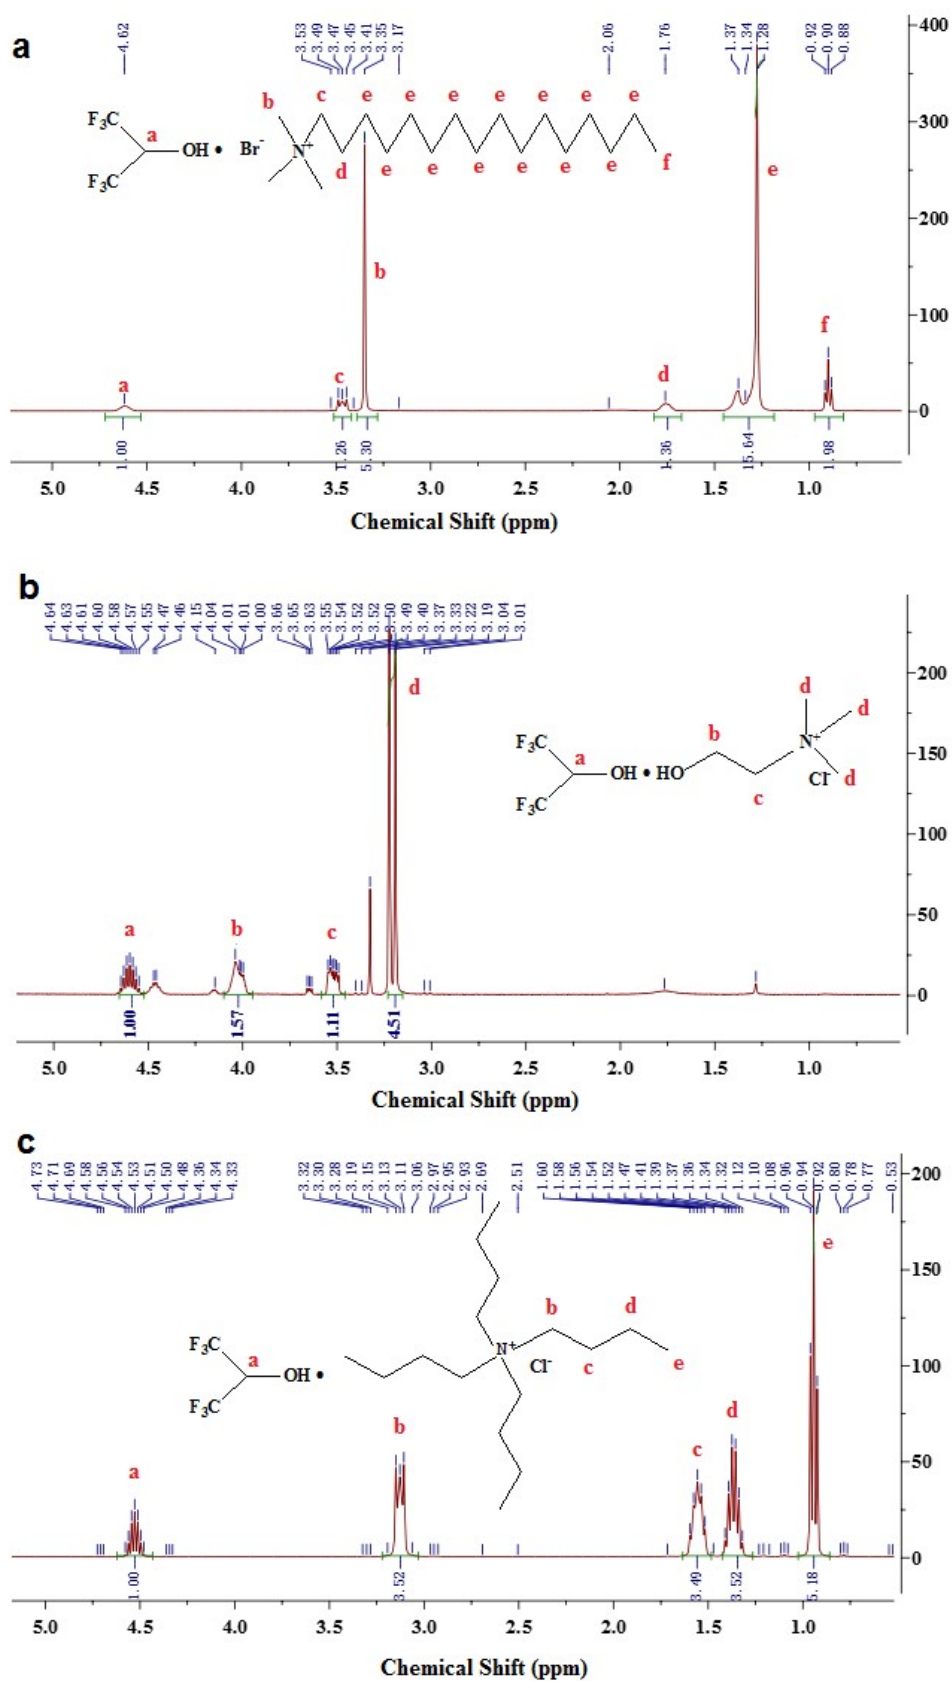

**Fig. S2**  $^1\text{H}$ -NMR spectra of: (a) HFIP-CTAB, (b) HFIP-ChCl and (c) HFIP-TBAC.

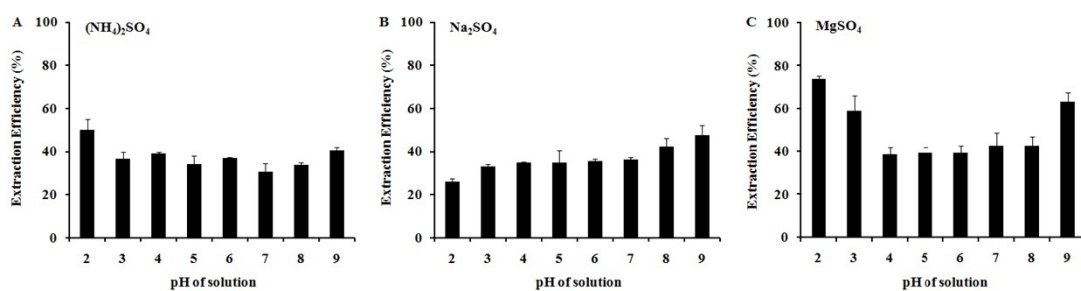

**Fig. S3** The effects of sample pH on the extraction of BSA in HFIP-ChCl- $(\text{NH}_4)_2\text{SO}_4$ , HFIP-ChCl- $\text{Na}_2\text{SO}_4$  and HFIP-ChCl- $\text{MgSO}_4$  systems.

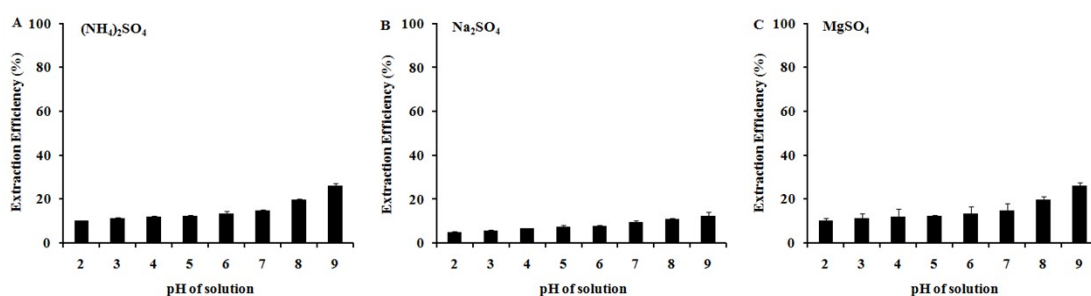

**Fig. S4** The effects of sample pH on the extraction of RNA in HFIP/ChCl- $(\text{NH}_4)_2\text{SO}_4$ , HFIP/ChCl- $\text{Na}_2\text{SO}_4$  and HFIP/ChCl- $\text{MgSO}_4$  systems.

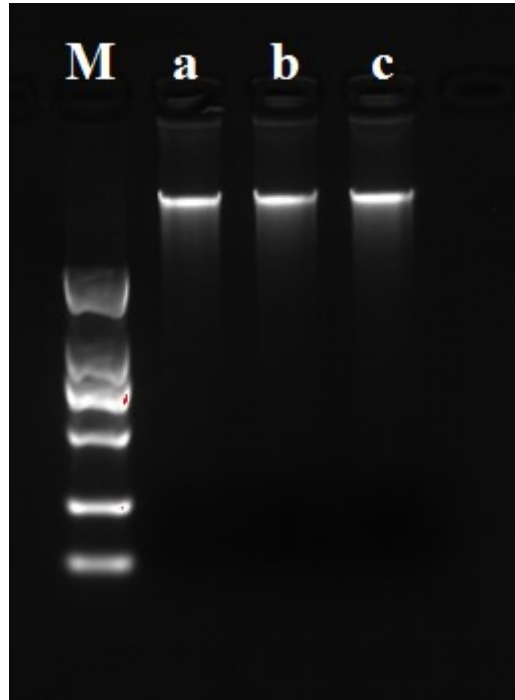

**Fig. S5** Agarose gel electrophoresis of the DNA recovered from back extraction using HFIP/ChCl-(NH<sub>4</sub>)<sub>2</sub>SO<sub>4</sub> system (a), HFIP/ChCl-Na<sub>2</sub>SO<sub>4</sub> system (b) and HFIP/ChCl-MgSO<sub>4</sub> system (c). Lane M represents the DNA molecular weight marker 2K.

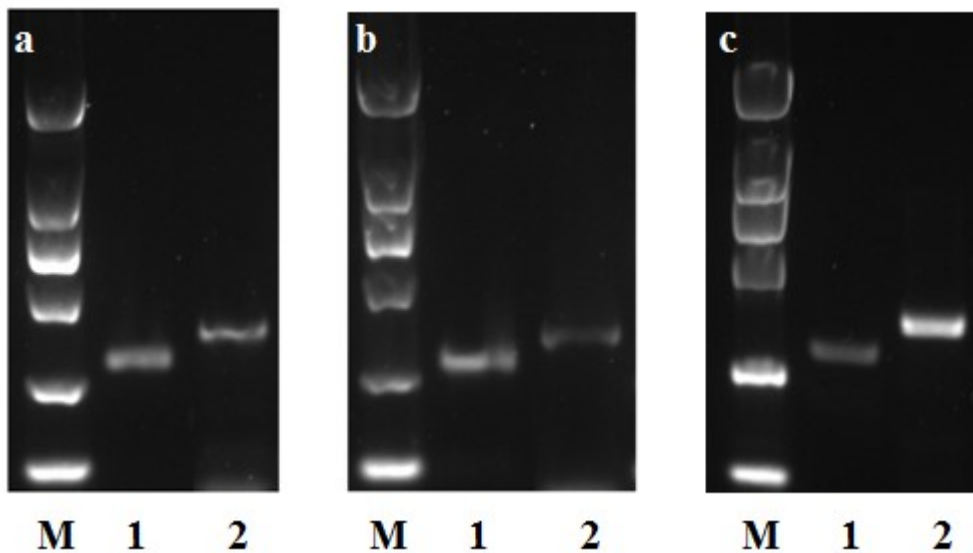

**Fig. S6** PCR amplification of *TP53* (lane 1) and *EGFR* (lane 2) sequences from human whole blood using HFIP/ChCl-(NH<sub>4</sub>)<sub>2</sub>SO<sub>4</sub> system (a), HFIP/ChCl-Na<sub>2</sub>SO<sub>4</sub> system (b) and HFIP/ChCl-MgSO<sub>4</sub> system (c). Lane M represents the DNA molecular weight marker 2K.

**Table S1** The DNA partitioning behavior in HFIP-based DES systems

| HBA  | Inorganic salts                                 | Two-phase formation | Two-phase formation after back extraction | Extraction efficiency of DNA after back extraction |
|------|-------------------------------------------------|---------------------|-------------------------------------------|----------------------------------------------------|
| ChCl | (NH <sub>4</sub> ) <sub>2</sub> SO <sub>4</sub> | √                   | √                                         | <b>a</b>                                           |
|      | K <sub>2</sub> HPO <sub>4</sub>                 | √                   | √                                         | <b>b</b>                                           |
|      | KH <sub>2</sub> PO <sub>4</sub>                 | √                   | ×                                         | -                                                  |
|      | Na <sub>2</sub> CO <sub>3</sub>                 | √                   | √                                         | <b>b</b>                                           |
|      | Na <sub>2</sub> HPO <sub>4</sub>                | √                   | √                                         | <b>b</b>                                           |
|      | Na <sub>2</sub> SO <sub>4</sub>                 | √                   | √                                         | <b>a</b>                                           |
|      | MgSO <sub>4</sub>                               | √                   | √                                         | <b>a</b>                                           |
| TBAC | (NH <sub>4</sub> ) <sub>2</sub> SO <sub>4</sub> | √                   | √                                         | <b>b</b>                                           |
|      | K <sub>2</sub> HPO <sub>4</sub>                 | √                   | √                                         | <b>b</b>                                           |
|      | KH <sub>2</sub> PO <sub>4</sub>                 | √                   | √                                         | <b>b</b>                                           |
|      | Na <sub>2</sub> CO <sub>3</sub>                 | √                   | √                                         | <b>b</b>                                           |
|      | Na <sub>2</sub> HPO <sub>4</sub>                | √                   | √                                         | <b>b</b>                                           |
|      | Na <sub>2</sub> SO <sub>4</sub>                 | √                   | √                                         | <b>b</b>                                           |
|      | MgSO <sub>4</sub>                               | √                   | √                                         | <b>b</b>                                           |
| CTAB | (NH <sub>4</sub> ) <sub>2</sub> SO <sub>4</sub> | √                   | ×                                         | -                                                  |
|      | K <sub>2</sub> HPO <sub>4</sub>                 | ×                   | -                                         | -                                                  |
|      | KH <sub>2</sub> PO <sub>4</sub>                 | √                   | ×                                         | -                                                  |
|      | Na <sub>2</sub> CO <sub>3</sub>                 | ×                   | -                                         | -                                                  |
|      | Na <sub>2</sub> HPO <sub>4</sub>                | ×                   | -                                         | -                                                  |
|      | Na <sub>2</sub> SO <sub>4</sub>                 | √                   | ×                                         | -                                                  |
|      | MgSO <sub>4</sub>                               | √                   | √                                         | <b>b</b>                                           |

√ The systems can separate into two phases.

×

The systems cannot be separated into two phases.

**a** The extraction efficiency of DNA was more than 50%.

**b** The extraction efficiency of DNA was less than 20%.

**Table S2** The primers of genes in this study.

|             |        |                |                      |
|-------------|--------|----------------|----------------------|
| <i>P53</i>  | 274 bp | Forward primer | GTCCCAAGCAATGGATGATT |
|             |        | Reverse primer | ACTGACCGTGCAAGTCACAG |
| <i>EGFR</i> | 335 bp | Forward primer | AGACGGGAAATTCACACCAG |
|             |        | Reverse primer | CTGTAAGAGGCAGGGCTTTG |
